# Supplementary material
Source: PubMed Central journal article supplement (PMC3909735)

Supplemental Figure 2. Kaplan–Meier curves to all-cause mortality by BMI categories in Korean HD patients (n = 20,818).

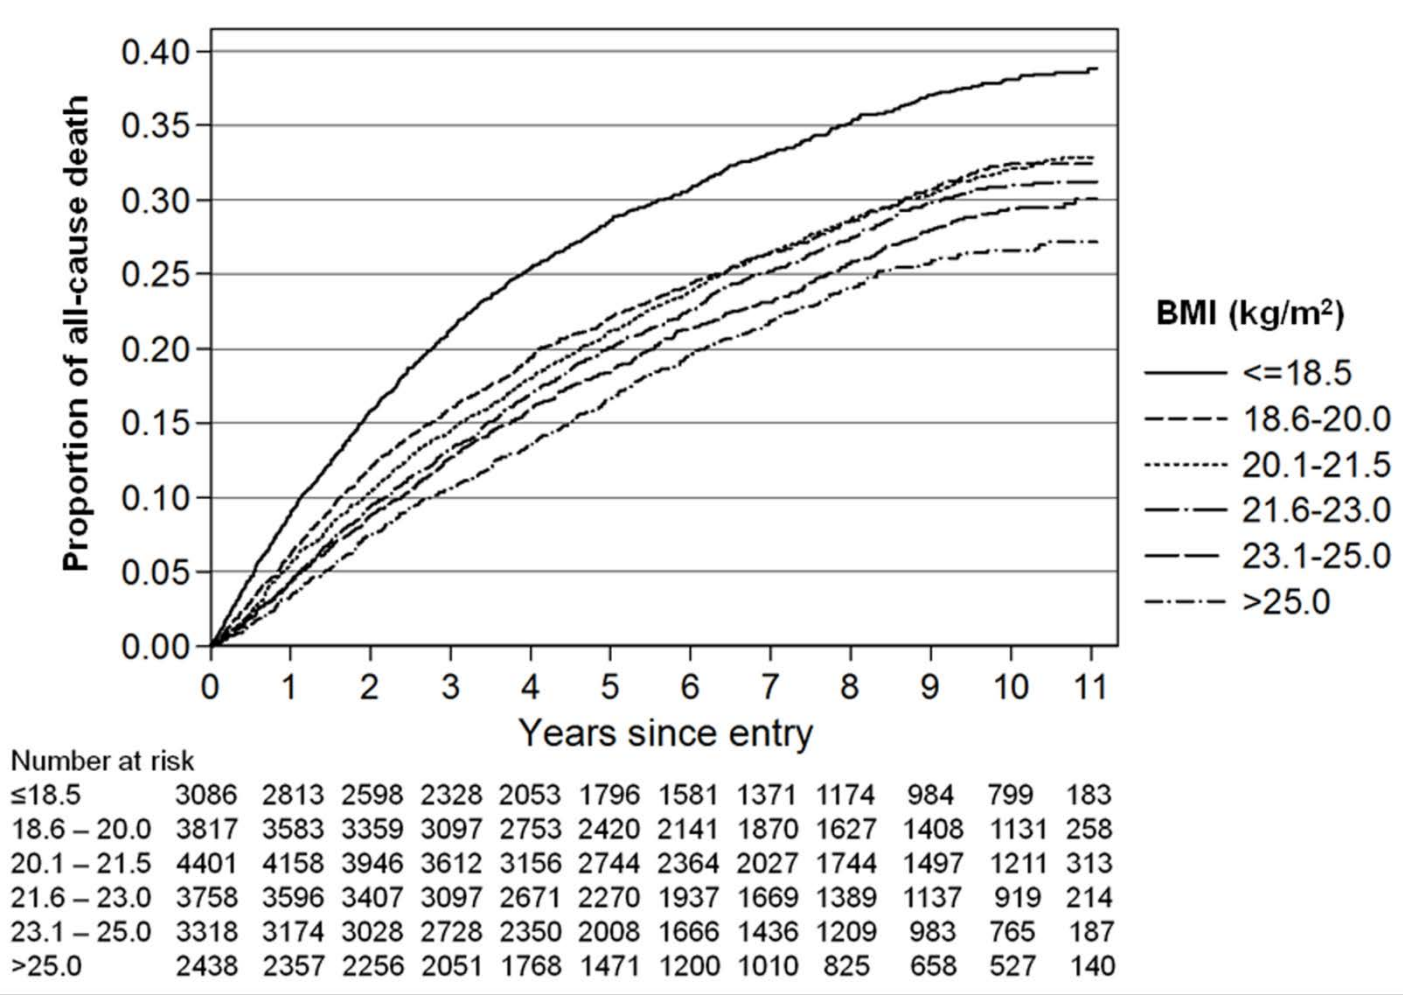

Supplement: NIHMS464882-supplement-07.pdf [file NIHMS464882-supplement-07.pdf]
