# Supplementary material
Source: PubMed Central journal article supplement (PMC3909735)
Supplement: NIHMS464882-supplement-08.pdf [file NIHMS464882-supplement-08.pdf]

Supplemental Figure 3. Kaplan–Meier curves to all-cause mortality by serum creatinine categories in Korean HD patients (n = 20,408).

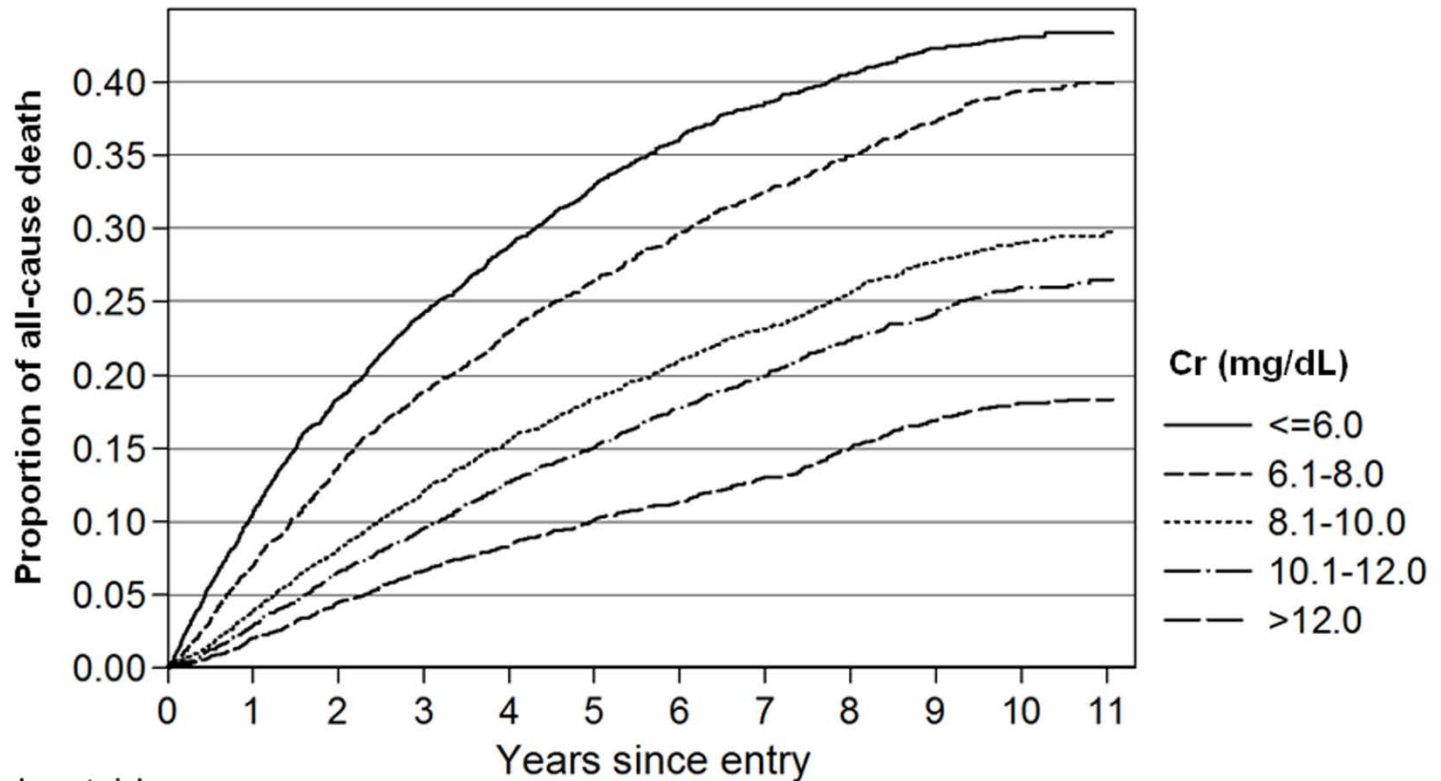

Number at risk

|             |      |      |      |      |      |      |      |      |      |      |      |     |
|-------------|------|------|------|------|------|------|------|------|------|------|------|-----|
| ≤6.0        | 4126 | 3691 | 3369 | 2939 | 2440 | 1971 | 1567 | 1301 | 1102 | 877  | 659  | 179 |
| 6.1 – 8.0   | 4516 | 4204 | 3898 | 3472 | 2931 | 2439 | 2008 | 1640 | 1354 | 1098 | 823  | 167 |
| 8.1 – 10.0  | 4676 | 4499 | 4299 | 3923 | 3432 | 2947 | 2520 | 2153 | 1800 | 1488 | 1174 | 257 |
| 10.1 – 12.0 | 3546 | 3445 | 3315 | 3068 | 2734 | 2412 | 2117 | 1874 | 1602 | 1366 | 1122 | 272 |
| >12.0       | 3544 | 3473 | 3387 | 3216 | 2951 | 2642 | 2415 | 2146 | 1854 | 1599 | 1342 | 325 |
