# Supplementary material
Source: PubMed Central journal article supplement (PMC3909735)
Supplement: NIHMS464882-supplement-10.pdf [file NIHMS464882-supplement-10.pdf]

Supplemental Figure 5. Adjusted hazard ratios (95% confidence interval) for all-cause death in Korean patients with vintage <1 versus  $\geq$  1 year: A) baseline body mass index, B) baseline serum creatinine level.<sup>†</sup>

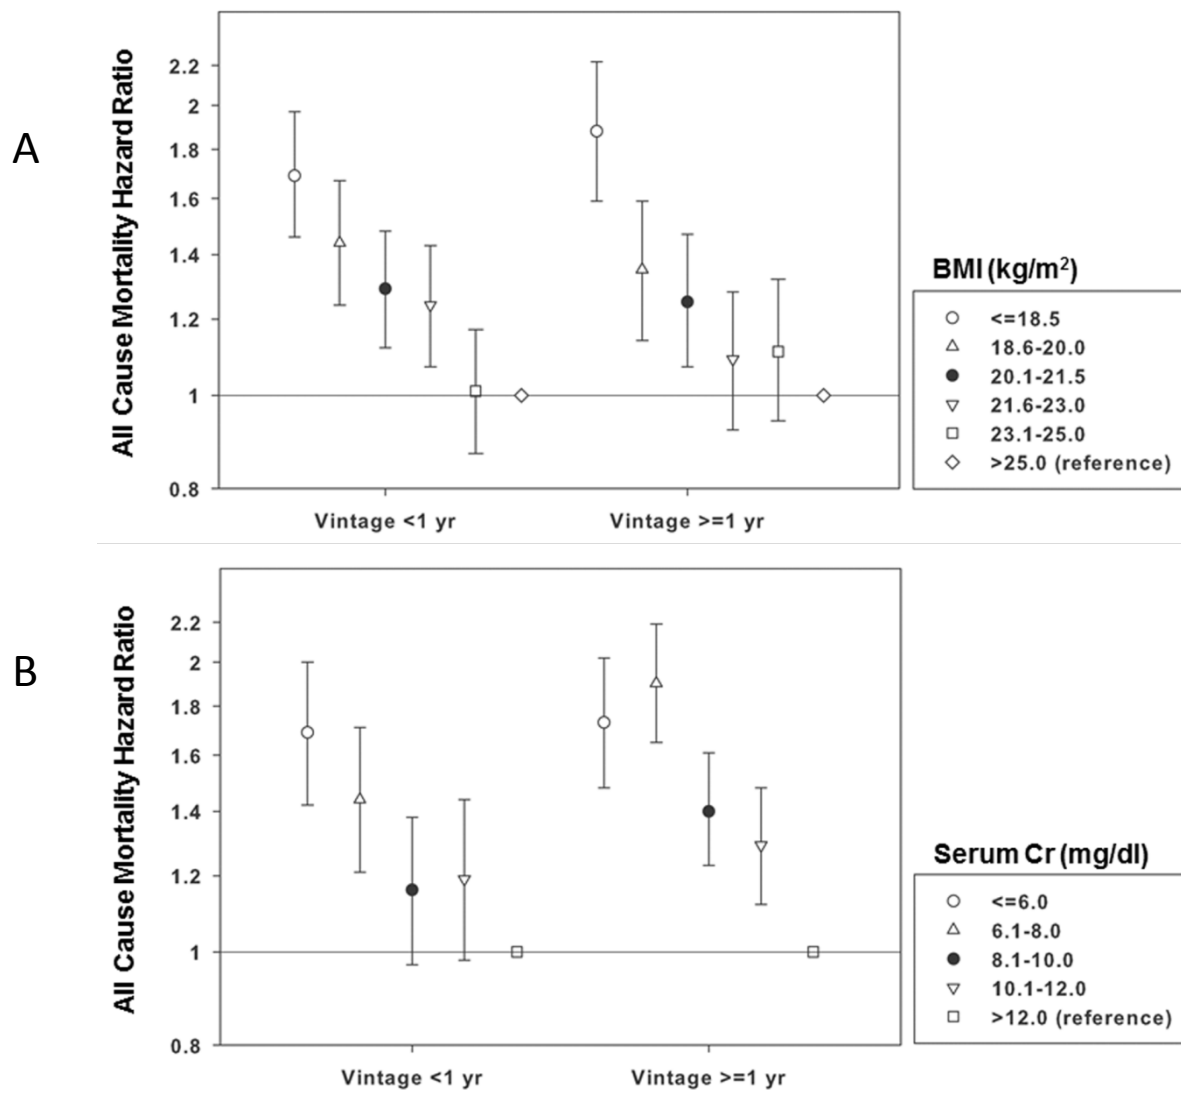

<sup>†</sup>Patients with BMI  $>25.0$  kg/m<sup>2</sup> and serum creatinine level  $>12.0$  mg/dL were reference groups. The model was adjusted for case-mix and nutrition covariates including age, gender, diabetes mellitus, dialysis vintage, single-pool Kt/V, hemoglobin, serum albumin and normalized protein nitrogen appearance.
