# Supplementary material
Source: PubMed Central journal article supplement (PMC3909735)

Supplemental Figure 1. Flow diagram for patient selection.

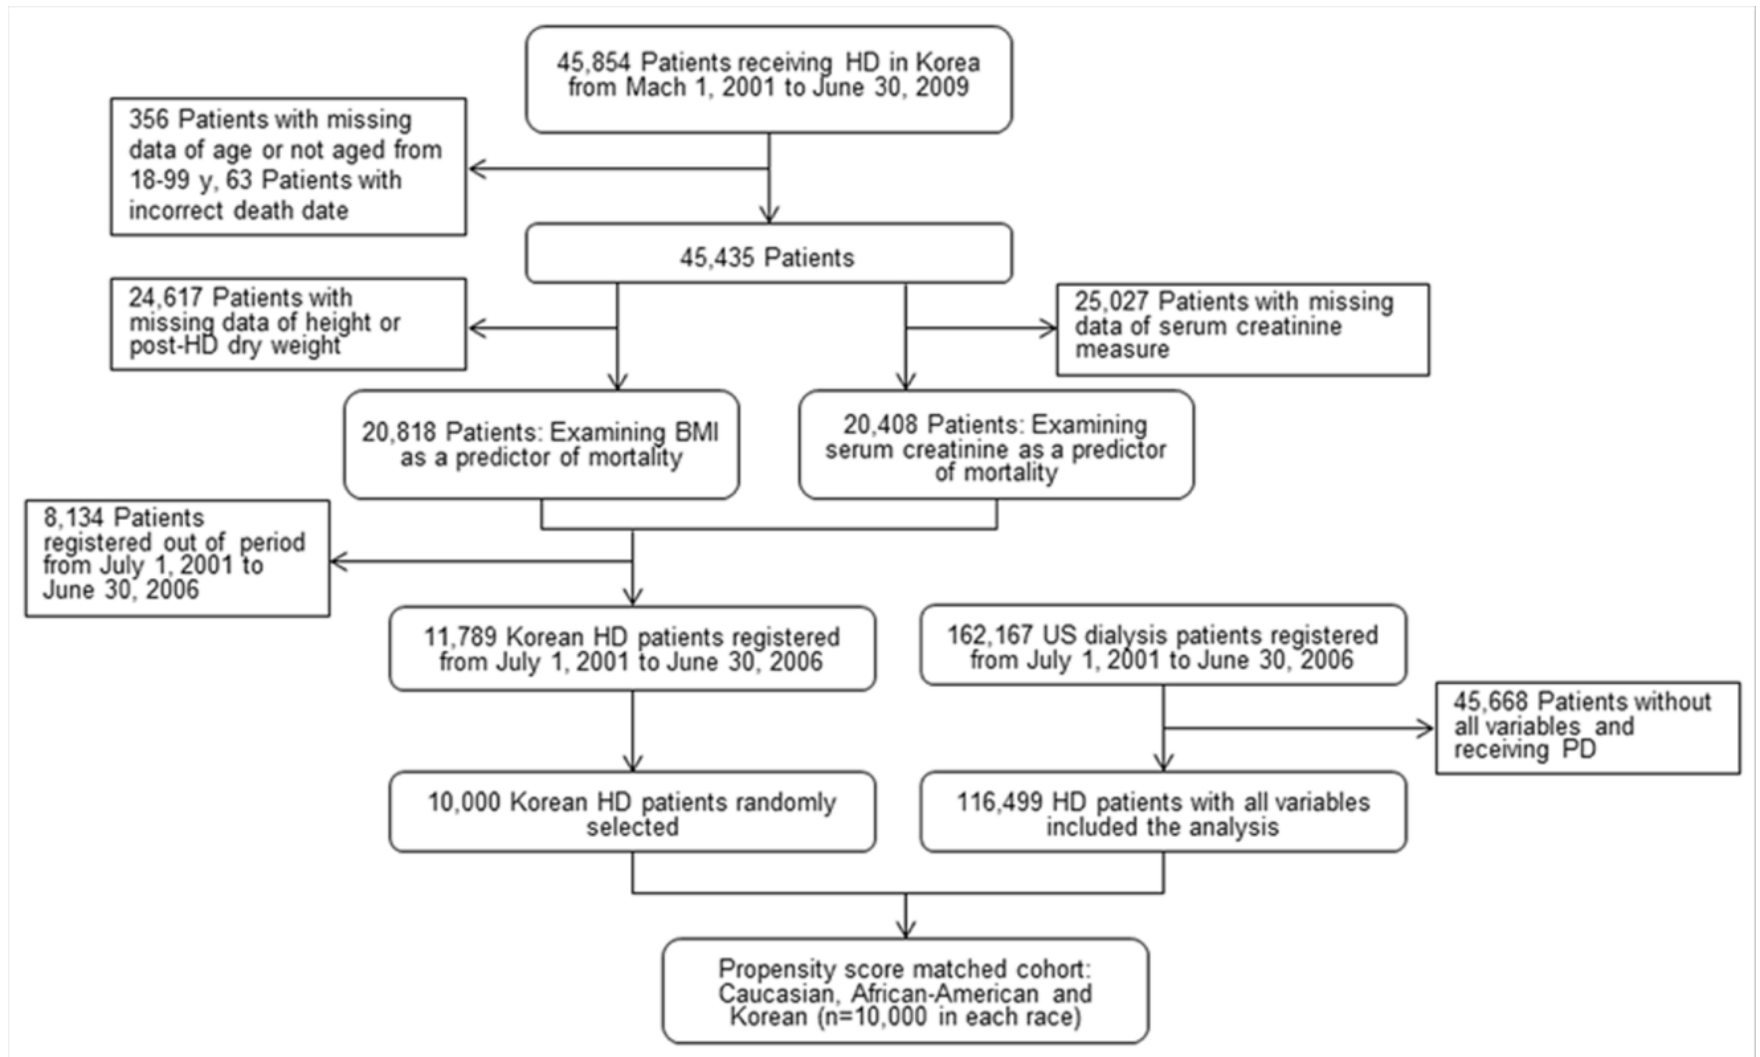

Supplement: NIHMS464882-supplement-06.pdf [file NIHMS464882-supplement-06.pdf]
